# Supplementary material
Source: PubMed Central journal article supplement (PMC6682720)
Supplement: ajcr0009-1396-f7.pdf [file ajcr0009-1396-f7.pdf]

## Trends in incidence and survival in patients with melanoma, 1974

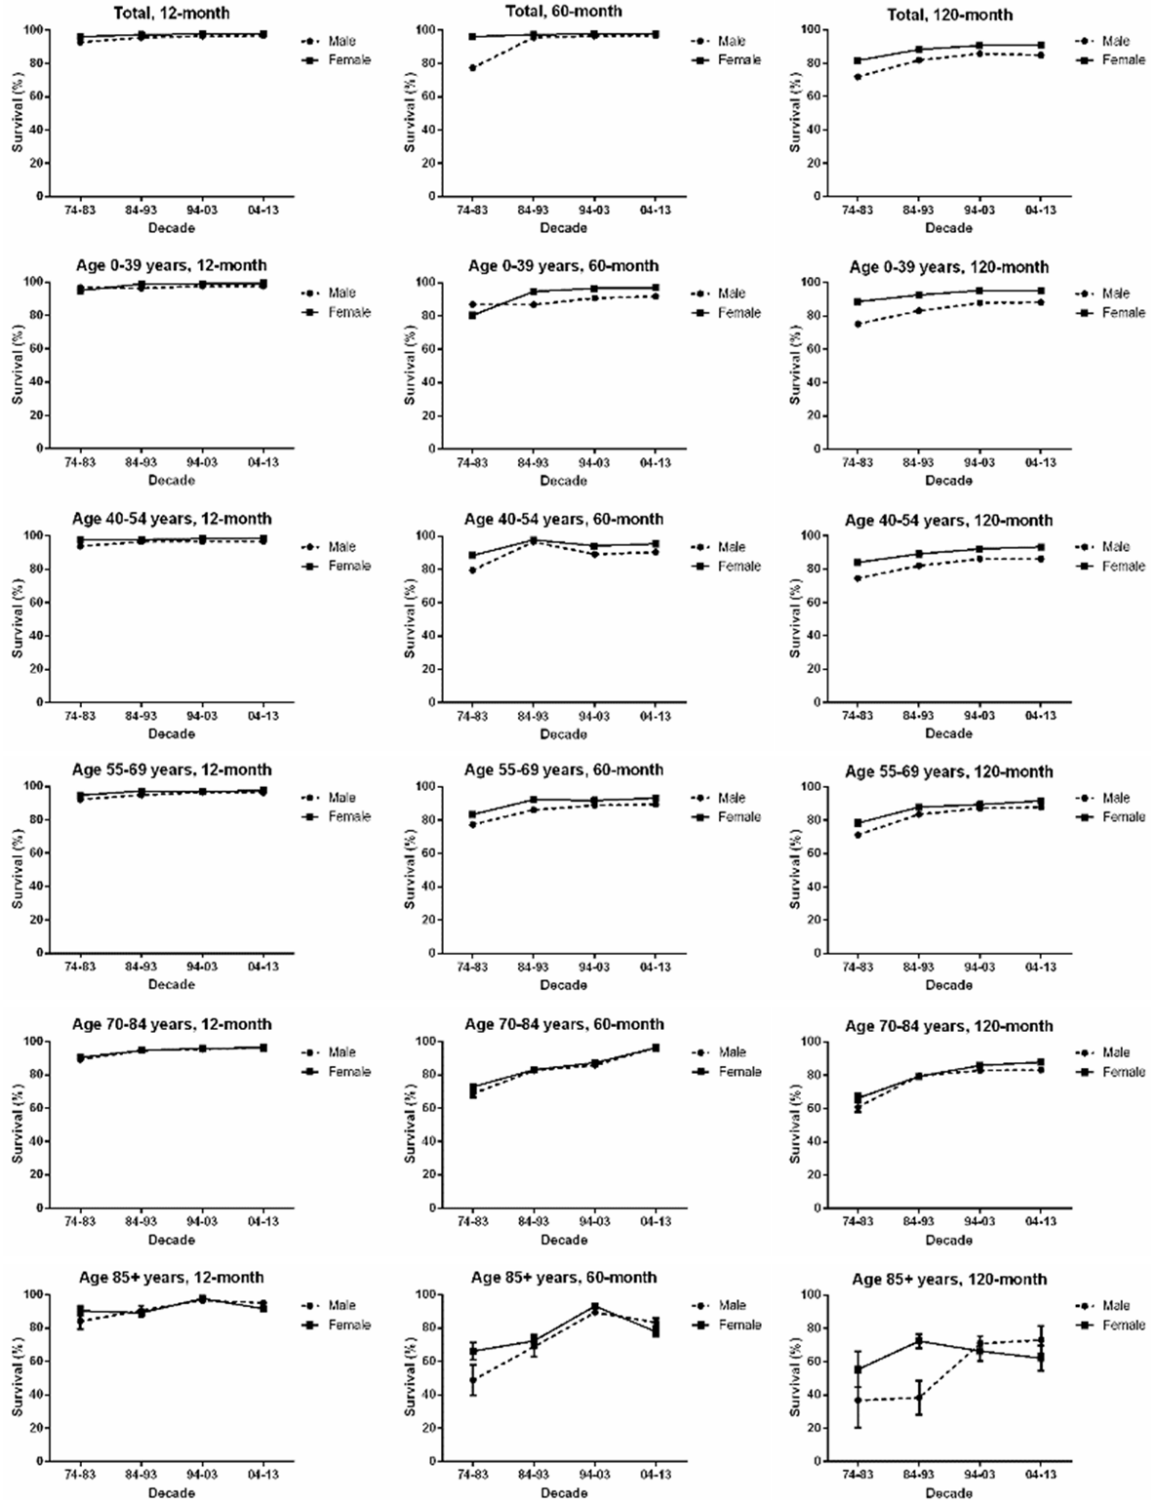

Figure S1. 12, 60 and 120-month relative survival rates of cutaneous melanoma from 1974 to 2013 at eighteen SEER sites by age group (total and ages 0-39, 40-54, 55-69, 70-84 and 85+ years).

## Trends in incidence and survival in patients with melanoma, 1974

**Table S1.** 12-month, 60-month and 12-month relative survival rates of melanoma patients according to race, age group, and calendar period from 1974 to 2013 at eighteen SEER sites. Data are means  $\pm$  standard error of the mean, with number of patients in parentheses

| Decade | Age Group | Race                     |                                       |                                     |
|--------|-----------|--------------------------|---------------------------------------|-------------------------------------|
|        |           | White                    | Black                                 | Other                               |
| 74-83  | 12-Mo RS  |                          |                                       |                                     |
|        | All       | 94.50 $\pm$ 0.20 (15994) | 79.5 $\pm$ 3.9 (124) <sup>***</sup>   | 88.0 $\pm$ 3.1 (122)                |
|        | 0-39      | 96.70 $\pm$ 0.30 (4698)  | 100 $\pm$ 0.0 (15)                    | 94.3 $\pm$ 4.0 (35)                 |
|        | 40-54     | 95.70 $\pm$ 0.30 (4421)  | 79.4 $\pm$ 7.2 (33) <sup>***</sup>    | 91.8 $\pm$ 5.7 (24)                 |
|        | 55-69     | 93.50 $\pm$ 0.40 (4338)  | 77.60 $\pm$ 6.9 (41) <sup>***</sup>   | 89.90 $\pm$ 5.0 (38)                |
|        | 70-84     | 90.3 $\pm$ 0.8 (2122)    | 61.9 $\pm$ 10.7 (24) <sup>***</sup>   | 75.5 $\pm$ 9.9 (22)                 |
|        | 85+       | 88.40 $\pm$ 2.50 (415)   | 93.0 $\pm$ 13.20 (11)                 | 37.2 $\pm$ 30.4 (3)                 |
|        | 60-Mo RS  |                          |                                       |                                     |
|        | All       | 81.7 $\pm$ 0.40 (15994)  | 58.3 $\pm$ 5.3 (124) <sup>***</sup>   | 63.4 $\pm$ 4.7 (122)                |
|        | 0-39      | 86.60 $\pm$ 0.50 (4698)  | 87.6 $\pm$ 8.9 (15)                   | 85.5 $\pm$ 6.2 (35)                 |
|        | 40-54     | 83.80 $\pm$ 0.60 (4421)  | 61.1 $\pm$ 9.1 (33) <sup>**</sup>     | 67.4 $\pm$ 9.7 (24)                 |
|        | 55-69     | 80.2 $\pm$ 0.7 (4338)    | 49.5 $\pm$ 8.7 (41) <sup>***</sup>    | 58.3 $\pm$ 8.5 (38)                 |
|        | 70-84     | 71.40 $\pm$ 1.50 (2122)  | 46.2 $\pm$ 13.3 (24)                  | 38.5 $\pm$ 12.0 (22)                |
|        | 85+       | 61.90 $\pm$ 5.30 (415)   | 50.0 $\pm$ 24.6 (11)                  | 0.00 $\pm$ 0.00 (3)                 |
|        | 120-Mo RS |                          |                                       |                                     |
|        | All       | 76.9 $\pm$ 0.50 (15994)  | 47.1 $\pm$ 6.0 (124) <sup>***</sup>   | 55.9 $\pm$ 5.1 (122)                |
|        | 0-39      | 82.40 $\pm$ 0.60 (4698)  | 75.1 $\pm$ 11.7 (15)                  | 82.8 $\pm$ 6.7 (35)                 |
|        | 40-54     | 79.2 $\pm$ 0.7 (4421)    | 51.2 $\pm$ 10.0 (33) <sup>***</sup>   | 65.1 $\pm$ 10.3 (24)                |
|        | 55-69     | 74.70 $\pm$ 0.90 (4338)  | 36.0 $\pm$ 9.3 (41) <sup>**</sup>     | 41.5 $\pm$ 8.8 (38)                 |
|        | 70-84     | 65.1 $\pm$ 2.0 (2122)    | 37.3 $\pm$ 17.0 (24)                  | 25.9 $\pm$ 11.7 (22)                |
|        | 85+       | 53.5 $\pm$ 9.4 (415)     | 0.00 $\pm$ 0.00 (11)                  | 0.00 $\pm$ 0.00 (3)                 |
| 84-93  | 12-Mo RS  |                          |                                       |                                     |
|        | All       | 96.40 $\pm$ 0.10 (27344) | 86.60 $\pm$ 3.10 (153) <sup>***</sup> | 89.70 $\pm$ 2.20 (231)              |
|        | 0-39      | 97.80 $\pm$ 0.20 (7064)  | 89.1 $\pm$ 6.1 (27) <sup>**</sup>     | 92.9 $\pm$ 3.4 (57)                 |
|        | 40-54     | 97.00 $\pm$ 0.20 (7373)  | 84.80 $\pm$ 7.40 (25) <sup>***</sup>  | 96.50 $\pm$ 2.60 (54)               |
|        | 55-69     | 95.80 $\pm$ 0.80 (7458)  | 88.8 $\pm$ 5.2 (46)                   | 92.6 $\pm$ 3.5 (61)                 |
|        | 70-84     | 94.90 $\pm$ 0.50 (4601)  | 81.4 $\pm$ 6.5 (45) <sup>**</sup>     | 79.90 $\pm$ 6.40 (47)               |
|        | 85+       | 89.70 $\pm$ 1.70 (848)   | 84.8 $\pm$ 13.4 (10)                  | 65.2 $\pm$ 15.9 (12)                |
|        | 60-Mo RS  |                          |                                       |                                     |
|        | All       | 87.60 $\pm$ 0.30 (27344) | 66.50 $\pm$ 4.90 (153)                | 69.5 $\pm$ 3.4 (231)                |
|        | 0-39      | 91.10 $\pm$ 0.40 (7064)  | 78.30 $\pm$ 8.0 (27)                  | 86.0 $\pm$ 4.7 (57)                 |
|        | 40-54     | 88.80 $\pm$ 0.40 (7373)  | 62.3 $\pm$ 10.2 (25)                  | 84.0 $\pm$ 5.20 (57)                |
|        | 55-69     | 86.80 $\pm$ 0.50 (7458)  | 73.6 $\pm$ 8.1 (46)                   | 75.2 $\pm$ 6.0 (61)                 |
|        | 70-84     | 83.30 $\pm$ 1.00 (4601)  | 46.5 $\pm$ 9.8 (45)                   | 37.5 $\pm$ 8.7 (47)                 |
|        | 85+       | 71.1 $\pm$ 3.4 (848)     | 72.4 $\pm$ 18.7 (10)                  | 0.00 $\pm$ 0.00 (12)                |
|        | 120-Mo RS |                          |                                       |                                     |
|        | All       | 84.70 $\pm$ 0.30 (27344) | 62.0 $\pm$ 5.2 (153) <sup>***</sup>   | 65.2 $\pm$ 3.7 (231)                |
|        | 0-39      | 88.20 $\pm$ 0.40 (7064)  | 78.3 $\pm$ 8.0 (27)                   | 82.7 $\pm$ 5.2 (57)                 |
|        | 40-54     | 85.00 $\pm$ 0.50 (7373)  | 62.3 $\pm$ 10.2 (25) <sup>**</sup>    | 75.7 $\pm$ 6.2 (57)                 |
|        | 55-69     | 85.0 $\pm$ 0.6 (7458)    | 65.6 $\pm$ 10.0 (46) <sup>*</sup>     | 71.3 $\pm$ 6.7 (61)                 |
|        | 70-84     | 79.8 $\pm$ 1.4 (4601)    | 35.6 $\pm$ 9.9 (45) <sup>**</sup>     | 31.3 $\pm$ 8.8 (47)                 |
|        | 85+       | 67.0 $\pm$ 8.1 (848)     | 42.5 $\pm$ 40.3 (10)                  | 0.00 $\pm$ 0.00 (12)                |
| 94-03  | 12-Mo RS  |                          |                                       |                                     |
|        | All       | 96.90 $\pm$ 0.10 (71630) | 87.30 $\pm$ 1.70 (452) <sup>***</sup> | 92.10 $\pm$ 1.10 (750) <sup>*</sup> |
|        | 0-39      | 98.40 $\pm$ 0.10 (13115) | 91.20 $\pm$ 3.0 (89) <sup>***</sup>   | 97.00 $\pm$ 1.40 (163) <sup>*</sup> |

## Trends in incidence and survival in patients with melanoma, 1974

|       |           |                     |                     |                    |
|-------|-----------|---------------------|---------------------|--------------------|
|       | 40-54     | 97.50±0.10 (21675)  | 88.70±3.40 (93)***  | 93.8±1.7 (207)     |
|       | 55-69     | 96.70±0.20 (19379)  | 88.00±3.10 (131)*** | 91.10±2.20 (188)   |
|       | 70-84     | 95.60±0.20 (14712)  | 86.9±3.7 (107)***   | 86.20±3.10 (154)   |
|       | 85+       | 93.40±0.90 (2749)   | 64.50±10.10 (32)*** | 90.05±7.00 (38)*   |
|       | 60-Mo RS  |                     |                     |                    |
|       | All       | 90.00±0.20 (71630)  | 70.00±2.60 (452)*** | 75.90±1.80 (750)   |
|       | 0-39      | 94.10±0.20 (13115)  | 77.0±4.5 (89)***    | 89.0±2.5 (163)***  |
|       | 40-54     | 91.20±0.20 (21675)  | 73.7±5.0 (93)***    | 82.40±2.80 (207)   |
|       | 55-69     | 90.00±0.30 (19379)  | 70.1±4.7 (131)***   | 68.0±3.7 (188)     |
|       | 70-84     | 86.50±0.50 (14712)  | 67.10±6.60 (107)*** | 63.2±4.7 (154)     |
|       | 85+       | 75.60±2.20 (2749)   | 36.40±13.20 (32)    | 62.40±13.30 (38)   |
|       | 120-Mo RS |                     |                     |                    |
|       | All       | 87.80±0.20 (71630)  | 65.8±0.3 (452)***   | 67.70±2.10 (750)   |
|       | 0-39      | 92.00±0.30 (13115)  | 73.4±4.9 (89)***    | 88.00±2.70 (163)** |
|       | 40-54     | 88.60±0.30 (21675)  | 67.3±5.5 (93)***    | 76.7±3.2 (207)     |
|       | 55-69     | 88.0±0.4 (19379)    | 67.6±5.2 (131)***   | 56.6±4.1 (188)     |
|       | 70-84     | 84.3±0.8 (14712)    | 57.6±8.3 (107)**    | 49.5±5.8 (154)     |
|       | 85+       | 69.80±4.60 (2749)   | 33.50±18.30 (32)    | 15.00±14.00 (38)   |
| 04-13 | 12-Mo RS  |                     |                     |                    |
|       | All       | 97.00±0.10 (129972) | 87.90±1.4 (734)***  | 90.00±0.90 (1259)  |
|       | 0-39      | 98.50±0.10 (17395)  | 96.9±1.8 (100)      | 94.10±1.60 (230)   |
|       | 40-54     | 97.50±0.10 (34409)  | 89.20±2.50 (166)*** | 93.80±1.40 (339)   |
|       | 55-69     | 96.80±0.10 (43089)  | 89.80±2.20 (234)*** | 89.20±1.80 (361)   |
|       | 70-84     | 96.40±0.20 (28375)  | 83.60±3.20 (187)*** | 86.20±2.40 (284)   |
|       | 85+       | 93.60±0.60 (6704)   | 70.10±8.60 (47)**   | 74.30±6.50 (65)    |
|       | 60-Mo RS  |                     |                     |                    |
|       | All       | 90.90±0.10 (129972) | 64.1±2.3 (734)***   | 71.00±1.70 (1259)* |
|       | 0-39      | 94.90±0.20 (17395)  | 84.7±4.1 (100)***   | 82.6±6.9 (230)     |
|       | 40-54     | 96.20±0.20 (34409)  | 64.9±4.3 (166)****  | 79.9±2.6 (339)**   |
|       | 55-69     | 90.70±0.20 (43089)  | 59.60±4.10 (234)*** | 66.3±3.1 (361)     |
|       | 70-84     | 87.90±0.40 (28375)  | 56.20±5.60 (187)*** | 59.00±4.50 (284)   |
|       | 85+       | 80.10±1.80 (6704)   | 48.2±9.9 (47)       | 49.7±11.3 (65)     |
|       | 120-Mo RS |                     |                     |                    |
|       | All       | 87.60±0.24 (129972) | 53.00±3.80 (734)*** | 61.00±2.65 (1259)  |
|       | 0-39      | 93.20±0.35 (17395)  | 74.00±7.10 (100)*** | 79.80±3.45 (230)   |
|       | 40-54     | 89.15±0.34 (34409)  | 57.00±6.00 (166)*** | 71.00±4.25 (339)   |
|       | 55-69     | 88.40±0.46 (43089)  | 49.80±6.80 (234)*** | 57.00±4.50 (361)   |
|       | 70-84     | 85.70±1.00 (28375)  | 47.20±12.10 (187)** | 46.30±7.50 (284)   |
|       | 85+       | 69.80±7.30 (6704)   | 0.00±0.00 (47)      | 38.00±6.50 (65)*** |

Abbreviations: Mo, month; RS, relative survival; SEM, standard error of the mean. \* $P < 0.01$ , \*\* $P < 0.001$ , and \*\*\* $P < 0.0001$  for comparisons with the White group.

## Trends in incidence and survival in patients with melanoma, 1974

**Table S2.** 12-month, 60-month and 120-month relative survival rates of melanoma patients according to SES, age group, and calendar period from 1974 to 2013 at eighteen SEER sites. Data are means  $\pm$  standard error of the mean, with number of patients in parenthesis

| Decade | Age Group | SES                      |                            |                         |
|--------|-----------|--------------------------|----------------------------|-------------------------|
|        |           | Low Poverty              | Medium Poverty             | High Poverty            |
| 74-83  | 12-Mo RS  |                          |                            |                         |
|        | All       | 94.80 $\pm$ 0.30 (9899)  | 94.00 $\pm$ 0.30 (6248)    | 90.50 $\pm$ 1.90 (291)* |
|        | 0-39      | 97.20 $\pm$ 0.20 (2829)  | 96.30 $\pm$ 0.40 (1961)*   | 91.3 $\pm$ 3.4 (69)*    |
|        | 40-54     | 95.90 $\pm$ 0.40 (2857)  | 95.00 $\pm$ 0.60 (1589)    | 93.6 $\pm$ 2.8 (78)     |
|        | 55-69     | 93.50 $\pm$ 0.50 (2711)  | 93.30 $\pm$ 0.70 (1649)    | 92.1 $\pm$ 3.1 (87)     |
|        | 70-84     | 90.40 $\pm$ 1.00 (1263)  | 89.50 $\pm$ 1.30 (869)     | 81.80 $\pm$ 6.70 (44)   |
|        | 85+       | 88.10 $\pm$ 3.30 (239)   | 88.8 $\pm$ 3.80 (180)      | 80.90 $\pm$ 14.90 (13)  |
|        | 60-Mo RS  |                          |                            |                         |
|        | All       | 82.40 $\pm$ 0.50 (9899)  | 80.8 $\pm$ 0.6 (6248)*     | 71.6 $\pm$ 3.1 (291)**  |
|        | 0-39      | 87.50 $\pm$ 0.60 (2829)  | 96.40 $\pm$ 0.80 (1961)*** | 75.4 $\pm$ 5.3 (69)***  |
|        | 40-54     | 84.60 $\pm$ 0.70 (2857)  | 82.70 $\pm$ 1.00 (1589)    | 76.8 $\pm$ 5.0 (78)     |
|        | 55-69     | 80.10 $\pm$ 0.90 (2711)  | 79.80 $\pm$ 1.20 (1649)    | 72.0 $\pm$ 5.6 (87)     |
|        | 70-84     | 73.00 $\pm$ 1.90 (1263)  | 68.4 $\pm$ 2.3 (869)       | 46.9 $\pm$ 9.8 (44)*    |
|        | 85+       | 60.60 $\pm$ 6.50 (239)   | 56.60 $\pm$ 7.80 (180)     | 74.0 $\pm$ 22.2 (13)    |
|        | 120-Mo RS |                          |                            |                         |
|        | All       | 77.40 $\pm$ 0.60 (9899)  | 76.4 $\pm$ 0.7             | 65.2 $\pm$ 3.6***       |
|        | 0-39      | 82.80 $\pm$ 0.70 (2829)  | 82.90 $\pm$ 0.90           | 74.1 $\pm$ 5.4          |
|        | 40-54     | 79.6 $\pm$ 0.90 (2857)   | 78.7 $\pm$ 1.2             | 70.9 $\pm$ 5.6          |
|        | 55-69     | 75.1 $\pm$ 1.20 (2711)   | 73.7 $\pm$ 1.5             | 62.4 $\pm$ 6.6          |
|        | 70-84     | 65.8 $\pm$ 2.60 (1263)   | 63.6 $\pm$ 2.9             | 37.4 $\pm$ 12.0*        |
|        | 85+       | 52.1 $\pm$ 12.4 (239)    | 46.1 $\pm$ 13.9            | 44.2 $\pm$ 28.7         |
| 84-93  | 12-Mo RS  |                          |                            |                         |
|        | All       | 96.60 $\pm$ 0.20 (16611) | 96.00 $\pm$ 0.20 (11281)   | 92.50 $\pm$ 1.40 (460)  |
|        | 0-39      | 97.90 $\pm$ 0.20 (4277)  | 97.70 $\pm$ 0.30 (3032)    | 98.2 $\pm$ 1.3 (108)    |
|        | 40-54     | 97.10 $\pm$ 0.30 (4616)  | 97.00 $\pm$ 0.30 (2928)    | 94.6 $\pm$ 2.3 (105)    |
|        | 55-69     | 96.40 $\pm$ 0.30 (4520)  | 95.20 $\pm$ 0.40 (3036)    | 90.4 $\pm$ 2.9 (120)    |
|        | 70-84     | 95.10 $\pm$ 0.60 (2703)  | 94.30 $\pm$ 0.70 (1925)    | 90.40 $\pm$ 3.60 (106)  |
|        | 85+       | 92.30 $\pm$ 2.20 (495)   | 87.20 $\pm$ 2.70 (360)     | 71.30 $\pm$ 12.20 (21)  |
|        | 60-Mo RS  |                          |                            |                         |
|        | All       | 88.30 $\pm$ 0.30 (16611) | 87.00 $\pm$ 0.40 (11281)   | 79.6 $\pm$ 2.4 (460)    |
|        | 0-39      | 91.4 $\pm$ 0.4 (4277)    | 91.30 $\pm$ 0.50 (3032)    | 89.4 $\pm$ 3.0 (108)    |
|        | 40-54     | 89.60 $\pm$ 0.50 (4616)  | 88.10 $\pm$ 0.70 (2928)    | 85.5 $\pm$ 3.7 (105)    |
|        | 55-69     | 88.00 $\pm$ 0.60 (4520)  | 86.0 $\pm$ 0.8 (3036)      | 68.8 $\pm$ 4.8 (120)    |
|        | 70-84     | 82.80 $\pm$ 1.30 (2703)  | 82.90 $\pm$ 1.5 (1925)     | 79.2 $\pm$ 5.6 (106)    |
|        | 85+       | 76.50 $\pm$ 4.60 (495)   | 65.40 $\pm$ 5.0 (360)      | 49.7 $\pm$ 17.2 (21)    |
|        | 120-Mo RS |                          |                            |                         |
|        | All       | 85.60 $\pm$ 0.40 (16611) | 84.4 $\pm$ 0.5             | 73.0 $\pm$ 2.9          |
|        | 0-39      | 88.80 $\pm$ 0.50 (4277)  | 87.90 $\pm$ 0.60           | 89.4 $\pm$ 3.0          |
|        | 40-54     | 86.00 $\pm$ 0.60 (4616)  | 84.4 $\pm$ 0.8             | 75.7 $\pm$ 4.7          |
|        | 55-69     | 86.30 $\pm$ 0.8          | 84.5 $\pm$ 1.0             | 62.3 $\pm$ 5.7          |
|        | 70-84     | 79.0 $\pm$ 1.7           | 79.8 $\pm$ 2.2             | 63.0 $\pm$ 9.1          |
|        | 85+       | 72.20 $\pm$ 11.30        | 60.6 $\pm$ 11.6            | 38.8 $\pm$ 20.8         |
| 94-03  | 12-Mo RS  |                          |                            |                         |
|        | All       | 97.50 $\pm$ 0.10 (33990) | 96.50 $\pm$ 0.10 (37949)   | 95.50 $\pm$ 0.40 (3369) |
|        | 0-39      | 98.60 $\pm$ 0.20 (6445)  | 98.40 $\pm$ 0.20 (7097)    | 97.30 $\pm$ 0.70 (546)  |

## Trends in incidence and survival in patients with melanoma, 1974

|       |           |                    |                    |                   |
|-------|-----------|--------------------|--------------------|-------------------|
|       | 40-54     | 98.00±0.10 (10531) | 97.10±0.2 (11382)  | 97.30±0.60 (946)  |
|       | 55-69     | 97.40±0.20 (9152)  | 96.20±0.20 (10084) | 95.70±0.70 (958)  |
|       | 70-84     | 96.60±0.30 (6632)  | 94.90±0.40 (7872)  | 93.20±1.20 (764)  |
|       | 85+       | 92.20±1.40 (1230)  | 94.30±1.20 (1514)  | 87.5±4.0 (155)    |
|       | 60-Mo RS  |                    |                    |                   |
|       | All       | 91.70±0.20 (33990) | 89.20±0.20 (37949) | 84.20±0.80 (3369) |
|       | 0-39      | 94.90±0.30 (6445)  | 93.90±0.30 (7097)  | 90.40±1.30 (546)  |
|       | 40-54     | 92.70±0.30 (10531) | 90.40±0.30 (11382) | 87.6±1.2 (946)    |
|       | 55-69     | 92.00±0.40 (9152)  | 88.60±0.40 (10084) | 85.30±1.40 (958)  |
|       | 70-84     | 88.5±0.7 (6632)    | 85.50±0.70 (7872)  | 76.10±2.40 (764)  |
|       | 85+       | 77.90±2.8 (1230)   | 74.10±2.90 (1514)  | 63.4±7.8 (155)    |
|       | 120-Mo RS |                    |                    |                   |
|       | All       | 90.2±0.3           | 86.70±0.30         | 79.00±1.00        |
|       | 0-39      | 93.00±0.40         | 92.00±0.40         | 87.0±1.5          |
|       | 40-54     | 90.60±0.40         | 87.80±0.40         | 83.7±1.4          |
|       | 55-69     | 90.6±0.5           | 86.50±0.50         | 78.9±1.8          |
|       | 70-84     | 87.2±1.1           | 82.40±1.10         | 69.60±3.40        |
|       | 85+       | 74.70±7.40         | 64.4±5.4           | 27.4±10.9         |
| 04-13 | 12-Mo RS  |                    |                    |                   |
|       | All       | 97.70±0.10 (60030) | 96.70±0.10 (70552) | 95.00±0.30 (8396) |
|       | 0-39      | 98.90±0.10 (8208)  | 98.40±0.10 (9617)  | 97.10±0.50 (1068) |
|       | 40-54     | 98.10±0.10 (16522) | 97.30±0.10 (18470) | 95.90±0.50 (2063) |
|       | 55-69     | 97.60±0.10 (19687) | 96.50±0.10 (23364) | 95.10±0.50 (2857) |
|       | 70-84     | 97.30±0.20 (12672) | 96.10±0.20 (15358) | 93.00±0.80 (1987) |
|       | 85+       | 94.90±0.90 (2941)  | 92.40±0.80 (3743)  | 94.20±2.30 (421)  |
|       | 60-Mo RS  |                    |                    |                   |
|       | All       | 93.20±0.20 (60030) | 90.00±0.20 (70552) | 84.10±0.60 (8396) |
|       | 0-39      | 95.90±0.30 (8208)  | 94.6±0.3 (9617)    | 90.6±1.1 (1068)   |
|       | 40-54     | 94.40±0.20 (16522) | 91.80±0.30 (18470) | 87.60±0.90 (2063) |
|       | 55-69     | 93.30±0.30 (19687) | 89.80±0.30 (23364) | 83.40±1.00 (2857) |
|       | 70-84     | 91.30±0.60 (12672) | 86.50±0.60 (15358) | 79.7±1.7 (1987)   |
|       | 85+       | 83.0±2.6 (2941)    | 80.90±2.40 (3743)  | 63.10±6.90 (421)  |
|       | 120-Mo RS |                    |                    |                   |
|       | All       | 92.0±0.35          | 87.50±0.35         | 79.60±0.96        |
|       | 0-39      | 94.60±0.5          | 82.80±0.46         | 88.80±1.35        |
|       | 40-54     | 93.0±0.45          | 89.6±0.45          | 84.8±1.40         |
|       | 55-69     | 92.6±0.45          | 87.00±0.58         | 78.00±1.45        |
|       | 70-84     | 90.00±1.2          | 83.60±1.5          | 71.60±2.90        |
|       | 85+       | 72.50±5.3          | 65.8±6.9           | 56.80±13.20       |

Abbreviations: Mo, month; RS, relative survival; SEM, standard error of the mean. \* $P < 0.01$ , \*\* $P < 0.001$ , and \*\*\* $P < 0.0001$  for comparisons with the Low Poverty group.

Trends in incidence and survival in patients with melanoma, 1974

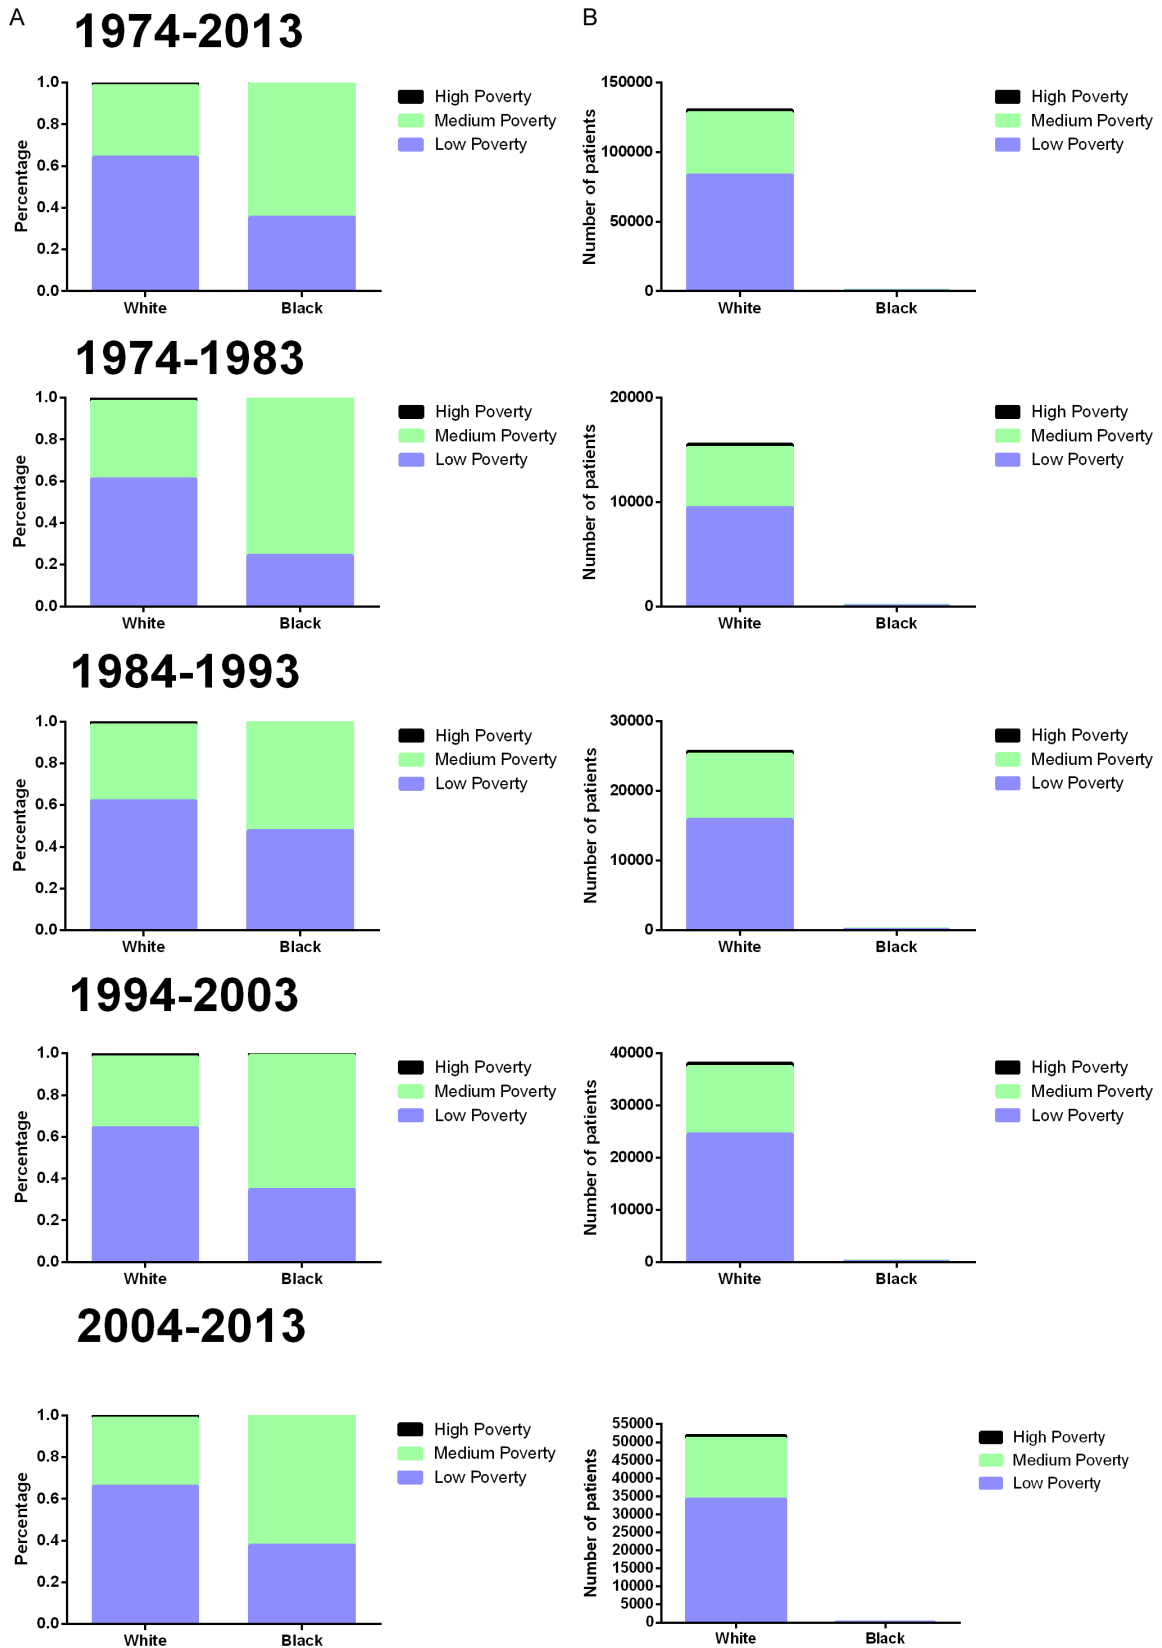

Figure S2. Changes of the distribution of SES in different races across four decades (A); and the numbers of patients with cutaneous melanoma of SES in different races across four decades (B).

## Trends in incidence and survival in patients with melanoma, 1974

**Table S3.** Summary data for race distribution by SES and calendar period in patients with melanoma from 1974 to 2013 at eighteen SEER sites

| Decades   | SES            | Number | White | Black | Other |
|-----------|----------------|--------|-------|-------|-------|
| 1974-2013 | Total          | 133996 | 100%  | 100%  | 100%  |
|           | Low Poverty    | 85275  | 64.1% | 35.5% | 44.6% |
|           | Medium Poverty | 46360  | 34.3% | 64.2% | 50.9% |
|           | High Poverty   | 2177   | 1.6%  | 0.3%  | 4.5%  |
| 1974-1983 | Total          | 16032  | 100%  | 100%  | 100%  |
|           | Low Poverty    | 9662   | 61.0% | 24.3% | 14.5% |
|           | Medium Poverty | 6044   | 37.2% | 75.7% | 78.6% |
|           | High Poverty   | 292    | 1.8%  | 0     | 6.9%  |
| 1984-1993 | Total          | 26441  | 100%  | 100%  | 100%  |
|           | Low Poverty    | 16216  | 61.9% | 47.8% | 26.3% |
|           | Medium Poverty | 9702   | 36.4% | 52.2% | 68%   |
|           | High Poverty   | 458    | 1.7%  | 0     | 5.7%  |
| 1994-2003 | Total          | 38772  | 100%  | 100%  | 100%  |
|           | Low Poverty    | 24751  | 64.3% | 34.8% | 43.6% |
|           | Medium Poverty | 13305  | 34.0% | 64.2% | 52.4% |
|           | High Poverty   | 671    | 1.7%  | 1.0%  | 4.0%  |
| 2004-2013 | Total          | 52751  | 100%  | 100%  | 100%  |
|           | Low Poverty    | 36646  | 66.0% | 37.8% | 58.0% |
|           | Medium Poverty | 17309  | 32.6% | 63.2% | 38.0% |
|           | High Poverty   | 756    | 1.4%  | 0     | 4.0%  |

## Trends in incidence and survival in patients with melanoma, 1974

**Table S4.** Relative survival rates of cutaneous melanoma patients during the periods of 1974-2013 at eighteen SEER sites. Data are mean  $\pm$  standard error of the mean, with number of patients in parentheses

| Age Group        | Decade                   |                             |                             |                           |
|------------------|--------------------------|-----------------------------|-----------------------------|---------------------------|
|                  | 1974-1983                | 1984-1993                   | 1994-2003                   | 2004-2013                 |
| <b>12-Mo RS</b>  |                          |                             |                             |                           |
| All              | 94.70 $\pm$ 0.20 (15793) | 96.50 $\pm$ 0.10 (28102)*** | 97.10 $\pm$ 0.10 (74669)*** | 97.20 $\pm$ 0.1 (138153)  |
| 0-39             | 96.80 $\pm$ 0.30 (4673)  | 97.80 $\pm$ 0.20 (7396)**   | 98.50 $\pm$ 0.10 (14047)*** | 98.60 $\pm$ 0.10 (18850)  |
| 40-54            | 95.70 $\pm$ 0.30 (4393)  | 97.00 $\pm$ 0.20 (7622)***  | 97.60 $\pm$ 0.10 (22740)**  | 97.70 $\pm$ 0.10 (36936)  |
| 55-69            | 93.70 $\pm$ 0.40 (4389)  | 96.10 $\pm$ 0.30 (7609)***  | 96.90 $\pm$ 0.10 (20007)**  | 97.00 $\pm$ 0.10 (45652)  |
| 70-84            | 90.70 $\pm$ 0.80 (2100)  | 95.10 $\pm$ 0.50 (4635)***  | 95.90 $\pm$ 0.20 (15048)    | 96.70 $\pm$ 0.20 (29722)* |
| 85+              | 89.10 $\pm$ 2.50 (416)   | 90.40 $\pm$ 1.70 (840)      | 93.70 $\pm$ 0.90 (2827)     | 94.20 $\pm$ 0.60 (6993)   |
| <b>60-Mo RS</b>  |                          |                             |                             |                           |
| All              | 82.10 $\pm$ 0.40         | 88.20 $\pm$ 0.30***         | 90.50 $\pm$ 0.20***         | 91.50 $\pm$ 0.1***        |
| 0-39             | 86.90 $\pm$ 0.50         | 91.40 $\pm$ 0.30***         | 94.30 $\pm$ 0.20***         | 95.10 $\pm$ 0.20          |
| 40-54            | 74.10 $\pm$ 0.60         | 89.20 $\pm$ 0.40***         | 91.60 $\pm$ 0.20***         | 93.00 $\pm$ 0.20***       |
| 55-69            | 80.6 $\pm$ 0.7           | 87.50 $\pm$ 0.50***         | 90.50 $\pm$ 0.30***         | 91.30 $\pm$ 0.20*         |
| 70-84            | 72.10 $\pm$ 1.50         | 84.20 $\pm$ 1.00***         | 87.10 $\pm$ 0.50**          | 88.80 $\pm$ 0.50*         |
| 85+              | 61.60 $\pm$ 5.30         | 73.0 $\pm$ 3.4              | 76.80 $\pm$ 2.20            | 81.90 $\pm$ 1.70          |
| <b>120-Mo RS</b> |                          |                             |                             |                           |
| All              | 77.30 $\pm$ 0.40         | 85.50 $\pm$ 0.30***         | 88.40 $\pm$ 0.20***         | 86.6 $\pm$ 0.35***        |
| 0-39             | 82.80 $\pm$ 0.60         | 88.60 $\pm$ 0.40***         | 92.30 $\pm$ 0.20***         | 93.6 $\pm$ 0.30***        |
| 40-54            | 79.40 $\pm$ 0.7          | 85.60 $\pm$ 0.50***         | 89.20 $\pm$ 0.30***         | 91.10 $\pm$ 0.30***       |
| 55-69            | 75.00 $\pm$ 0.90         | 85.8 $\pm$ 0.6***           | 88.6 $\pm$ 0.4***           | 89.20 $\pm$ 0.35          |
| 70-84            | 66.2 $\pm$ 2.0           | 80.9 $\pm$ 1.3***           | 85.10 $\pm$ 0.8**           | 86.40 $\pm$ 0.80          |
| 85+              | 51.9 $\pm$ 9.2           | 68.6 $\pm$ 8.2              | 70.7 $\pm$ 4.5              | 72.0 $\pm$ 6.9            |

Abbreviations: Mo, month; RS, relative survival; SEM, standard error of the mean. \* $P < 0.01$ , \*\* $P < 0.001$ , and \*\*\* $P < 0.0001$  for comparisons with the preceding decade.



## Trends in incidence and survival in patients with melanoma, 1974

**Table S5.** 12-month relative survival rates of mucosal melanoma patients during the periods of 1974-2013 at eighteen SEER sites. Data are mean  $\pm$  standard error of the mean, with number of patients in parentheses

| Age Group        | Decade                 |                        |                        |                         |
|------------------|------------------------|------------------------|------------------------|-------------------------|
|                  | 1974-1983              | 1984-1993              | 1994-2003              | 2004-2013               |
| <b>12-Mo RS</b>  |                        |                        |                        |                         |
| All              | 75.60 $\pm$ 3.10 (221) | 80.60 $\pm$ 2.50 (308) | 77.30 $\pm$ 1.70 (684) | 74.80 $\pm$ 1.40 (1107) |
| 0-39             | 89.40 $\pm$ 5.80 (28)  | 97.3 $\pm$ 2.7 (37)    | 79.50 $\pm$ 5.80 (49)* | 91.0 $\pm$ 3.3 (82)     |
| 40-54            | 81.60 $\pm$ 6.90 (32)  | 92.9 $\pm$ 4.1 (41)    | 86.30 $\pm$ 3.00 (136) | 83.90 $\pm$ 2.80 (192)  |
| 55-69            | 75.00 $\pm$ 5.50 (65)  | 74.20 $\pm$ 5.00 (82)  | 79.60 $\pm$ 3.00 (193) | 76.40 $\pm$ 2.40 (350)  |
| 70-84            | 70.60 $\pm$ 5.50 (80)  | 76.60 $\pm$ 4.50 (108) | 72.60 $\pm$ 3.20 (230) | 69.80 $\pm$ 2.70 (358)  |
| 85+              | 64.3 $\pm$ 14.2 (16)   | 75.90 $\pm$ 8.80 (40)  | 66.6 $\pm$ 6.5 (76)    | 59.50 $\pm$ 5.30 (125)  |
| <b>60-Mo RS</b>  |                        |                        |                        |                         |
| All              | 44.10 $\pm$ 3.80       | 39.80 $\pm$ 3.20       | 41.70 $\pm$ 2.10       | 36.50 $\pm$ 2.00        |
| 0-39             | 78.7 $\pm$ 7.8         | 78.7 $\pm$ 6.8         | 63.0 $\pm$ 7.0         | 70.3 $\pm$ 5.7          |
| 40-54            | 44.7 $\pm$ 9.0         | 44.7 $\pm$ 7.9         | 49.1 $\pm$ 4.4         | 43.1 $\pm$ 4.5          |
| 55-69            | 36.4 $\pm$ 6.3         | 38.0 $\pm$ 5.7         | 39.40 $\pm$ 3.70       | 36.2 $\pm$ 3.3          |
| 70-84            | 37.40 $\pm$ 6.60       | 26.50 $\pm$ 5.00       | 37.5 $\pm$ 3.9         | 30.40 $\pm$ 3.30        |
| 85+              | 32.7 $\pm$ 17.0        | 31.3 $\pm$ 10.8        | 27.3 $\pm$ 7.6         | 16.2 $\pm$ 6.3          |
| <b>120-Mo RS</b> |                        |                        |                        |                         |
| All              | 36.9 $\pm$ 4.1         | 34.4 $\pm$ 3.4         | 33.50 $\pm$ 2.30       | 23.0 $\pm$ 2.90*        |
| 0-39             | 75.3 $\pm$ 8.2         | 73.5 $\pm$ 7.4         | 63.0 $\pm$ 7.0         | 65.2 $\pm$ 6.5          |
| 40-54            | 42.8 $\pm$ 9.2         | 32.8 $\pm$ 7.5         | 39.40 $\pm$ 4.40       | 28.1 $\pm$ 5.2          |
| 55-69            | 27.5 $\pm$ 6.2         | 35.5 $\pm$ 6.00        | 33.0 $\pm$ 3.7         | 17.3 $\pm$ 5.7          |
| 70-84            | 23.3 $\pm$ 6.9         | 19.4 $\pm$ 5.4         | 25.7 $\pm$ 4.0         | 19.9 $\pm$ 4.5          |
| 85+              | 28.6 $\pm$ 27.7        | 20.1 $\pm$ 19.0        | 0 $\pm$ 0              | 0 $\pm$ 0               |

Abbreviations: Mo, month; RS, relative survival; SEM, standard error of the mean. \* $P < 0.01$  for comparisons with the preceding decade.

## Trends in incidence and survival in patients with melanoma, 1974

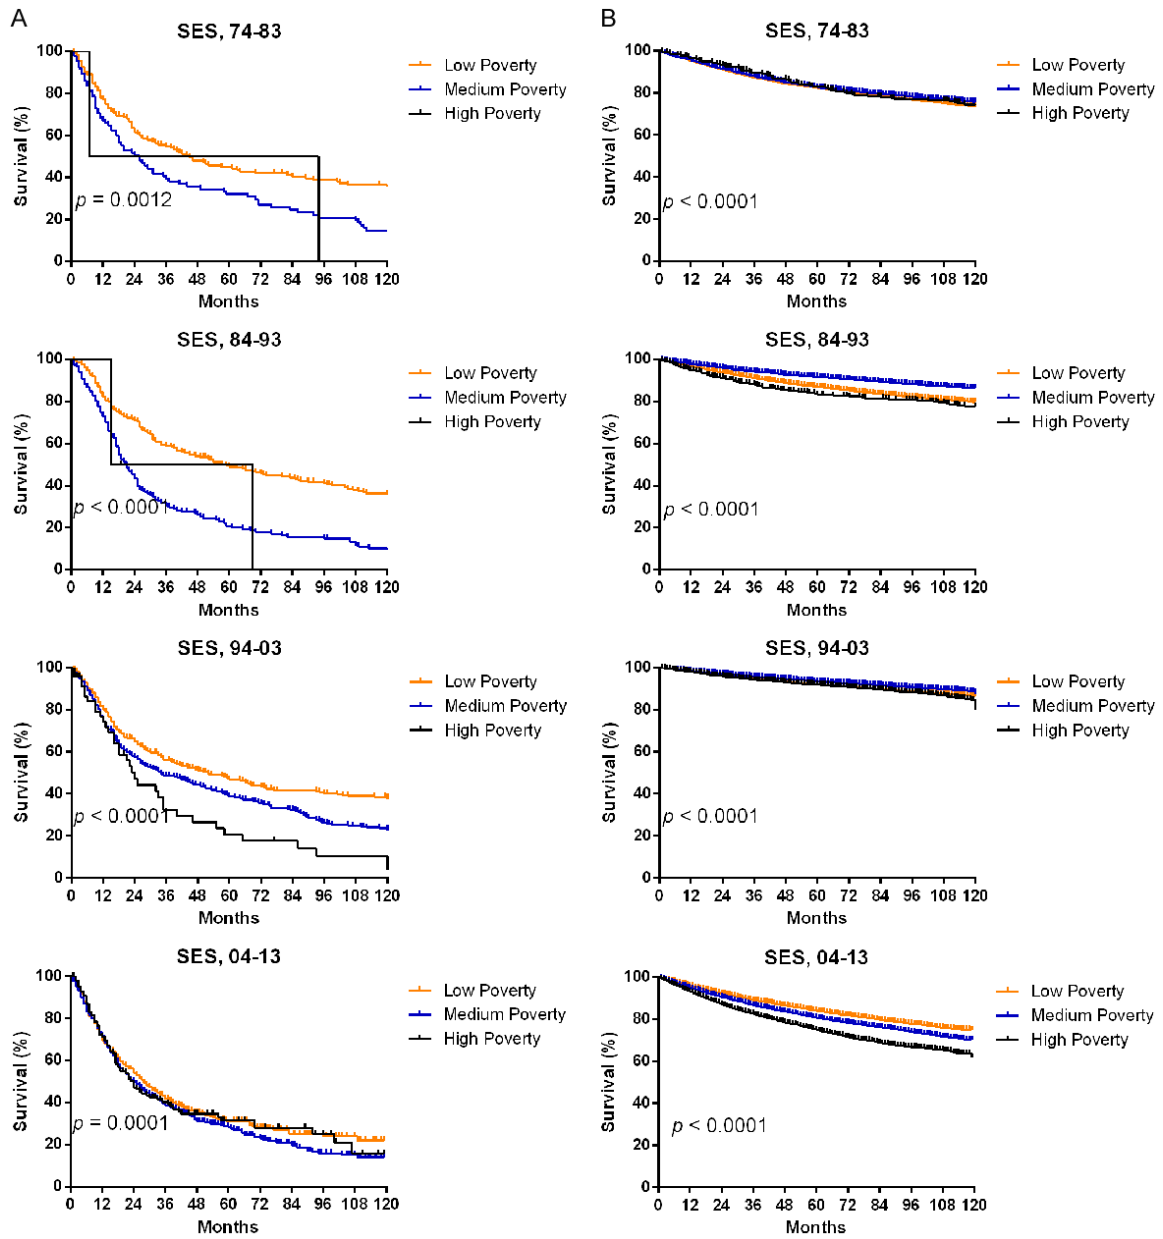

**Figure S3.** Trends in Kaplan-Meier survival analysis for patients with two types melanoma at eighteen SEER sites in SES across four decades. (A for mucosal melanoma, while B for cutaneous melanoma).
